# Supplementary material for: The Plasmin-Sensitive Protein Pls in Methicillin-Resistant Staphylococcus aureus (MRSA) Is a Glycoprotein
Source: PubMed Central journal article supplement (PMC5230774; doi:10.1371/journal.ppat.1006110), 2017-01-12
Supplement: ppat.1006110.s001.pdf [file ppat.1006110.s001.pdf]

**S1 Table.** Summary of (glyco)peptides derived from acid hydrolysis of PIs from *S. aureus* strain 1061 and detected by nanoESI MS. Species with the remark “CID” have been further characterized by CID experiments and evaluation of the resulting fragment ion spectra.

| peptide                             | n x HexNAc | m/z <sub>exp</sub> | m/z <sub>calc</sub> | remark       |
|-------------------------------------|------------|--------------------|---------------------|--------------|
| SD                                  | 0          | 221.06             | 221.0768            |              |
| SD                                  | 1          | 424.15             | 424.1562            | CID          |
| SDSD                                | 0          | 423.13             | 423.1358            |              |
| SDSD                                | 1          | 626.20             | 626.2152            | CID          |
| SDSD                                | 2          | 829.30             | 829.2946            | CID          |
| SDSDSD                              | 0          | 625.19             | 625.1948            |              |
| SDSDSD                              | 1          | 828.28             | 828.2742            |              |
| SDSDSD                              | 2          | 1031.34            | 1031.3536           | CID          |
| SDSDSD                              | 3          | 1234.41            | 1234.4330           | CID          |
| SDSDSDSD                            | 0          | 825.26             | 825.2537            |              |
| SDSDSDSD                            | 1          | 1030.36            | 1030.3331           |              |
| SDSDSDSD                            | 2          | 1233.41            | 1233.4125           |              |
| SDSDSDSD                            | 3          | 1436.52            | 1436.4919           |              |
| SDSDSDSD                            | 4          | 1639.56            | 1639.5713           |              |
| SDSDSDSDSD                          | 0          | -                  | 1029.3127           |              |
| SDSDSDSDSD                          | 1          | 1232.38            | 1232.3921           |              |
| SDSDSDSDSD                          | 2          | 1435.49            | 1435.4715           |              |
| SDSDSDSDSD                          | 3          | 1638.51            | 1638.5509           |              |
| SDSDSDSDSD                          | 4          | 1841.69            | 1841.6303           |              |
| SDSDSDSDSD                          | 5          | -                  | 2044.7097           |              |
|                                     |            |                    |                     |              |
| ADSD or SDAD                        | 0          | 407.12             | 407.1409            | CID, isomers |
| ADSD or SDAD                        | 1          | 610.21             | 610.2203            | CID, isomers |
| AD(SD) <sub>2</sub>                 | 0          | 609.19             | 609.1998            |              |
| AD(SD) <sub>2</sub>                 | 1          | 812.27             | 812.2792            | CID, isomers |
| AD(SD) <sub>2</sub>                 | 2          | 1015.35            | 1015.3586           | CID, isomers |
| AD(SD) <sub>3</sub>                 | 0          | 811.26             | 811.2588            |              |
| AD(SD) <sub>3</sub>                 | 1          | 1014.33            | 1014.3382           |              |
| AD(SD) <sub>3</sub>                 | 2          | 1217.44            | 1217.4176           | CID, isomers |
| AD(SD) <sub>3</sub>                 | 3          | 1420.49            | 1420.4970           | CID, isomers |
| AD(SD) <sub>4</sub>                 | 0          | 1013.32            | 1013.3178           |              |
| AD(SD) <sub>4</sub>                 | 1          | 1216.41            | 1216.3972           |              |
| AD(SD) <sub>4</sub>                 | 2          | 1419.46            | 1419.4766           |              |
| AD(SD) <sub>4</sub>                 | 3          | 1622.57            | 1622.5560           | CID, isomers |
| AD(SD) <sub>4</sub>                 | 4          | 1825.65            | 1825.6354           |              |
| AD(SD) <sub>5</sub>                 | 0          | 1215.38            | 1215.3768           |              |
| AD(SD) <sub>5</sub>                 | 1          | 1418.48            | 1418.4562           |              |
| AD(SD) <sub>5</sub>                 | 2          | 1621.52            | 1621.5356           |              |
| AD(SD) <sub>5</sub>                 | 3          | 1824.69            | 1824.6150           |              |
| AD(SD) <sub>5</sub>                 | 4          | 2027.65            | 2027.6944           |              |
| ADSDSDAD                            | 0          | 795.25             | 795.2639            |              |
| ADSDSDAD                            | 1          | 998.36             | 998.3433            |              |
| ADSDSDAD                            | 2          | 1201.41            | 1201.4227           | CID          |
| (AD) <sub>2</sub> (SD) <sub>3</sub> | 0          | 997.35             | 997.3229            |              |
| (AD) <sub>2</sub> (SD) <sub>3</sub> | 1          | 1200.39            | 1200.4023           |              |
| (AD) <sub>2</sub> (SD) <sub>3</sub> | 2          | 1403.48            | 1403.4817           |              |
| (AD) <sub>2</sub> (SD) <sub>3</sub> | 3          | 1606.61            | 1606.5611           |              |
| (AD) <sub>2</sub> (SD) <sub>4</sub> | 0          | 1199.41            | 1199.3818           |              |
| (AD) <sub>2</sub> (SD) <sub>4</sub> | 1          | 1402.50            | 1402.4612           |              |

|                |   |         |           |  |
|----------------|---|---------|-----------|--|
| $(AD)_2(SD)_4$ | 2 | 1605.57 | 1605.5406 |  |
| $(AD)_2(SD)_4$ | 3 | 1808.67 | 1808.6200 |  |
| $(AD)_2(SD)_4$ | 4 | 2011.81 | 2011.6994 |  |
| $(AD)_2(SD)_5$ | 0 | 1401.49 | 1401.4408 |  |
| $(AD)_2(SD)_5$ | 1 | 1604.58 | 1604.5202 |  |
| $(AD)_2(SD)_5$ | 2 | 1807.66 | 1807.5996 |  |
| $(AD)_2(SD)_5$ | 3 | 2010.80 | 2010.6790 |  |
| $(AD)_3(SD)_4$ | 0 | 1385.47 | 1385.4459 |  |
| $(AD)_3(SD)_4$ | 1 | 1588.57 | 1588.5253 |  |
| $(AD)_3(SD)_4$ | 2 | 1791.67 | 1791.6047 |  |
| $(AD)_3(SD)_4$ | 3 | 1994.77 | 1994.6841 |  |
