# Supplementary material for: The Plasmin-Sensitive Protein Pls in Methicillin-Resistant Staphylococcus aureus (MRSA) Is a Glycoprotein
Source: PubMed Central journal article supplement (PMC5230774; doi:10.1371/journal.ppat.1006110), 2017-01-12
Supplement: ppat.1006110.s002.pdf [file ppat.1006110.s002.pdf]

PIs

| Start | End  | Observed (m/z) | Mr(expt) | Mr(calc) | Delta | Miss | Peptide                                 |
|-------|------|----------------|----------|----------|-------|------|-----------------------------------------|
| 411   | 424  | 734,37         | 1466,74  | 1466,73  | 0,01  | 0    | K.GTGNFTAHDIIHK.T                       |
| 535   | 546  | 558,79         | 1115,56  | 1115,59  | 0,03  | 0    | K.TNNLSQIGAAK.V                         |
| 598   | 619  | 767,71         | 2300,10  | 2300,15  | -0,05 | 0    | R.LNDVVLNYDAATSTITATYAG<br>K.T          |
| 688   | 704  | 624,31         | 1869,91  | 1869,94  | -0,02 | 0    | R.EFDPTLEPGSPDVIVQK.G                   |
| 779   | 795  | 599,64         | 1795,89  | 1795,88  | 0,00  | 0    | K.NPETGEVVTPPVDDVTK.H                   |
| 839   | 853  | 787,93         | 1573,85  | 1573,82  | 0,03  | 0    | K.TTTTPTTINPLTGEK.V                     |
| 907   | 923  | 898,96         | 1795,91  | 1795,88  | 0,02  | 0    | K.NPETGEVVTPPVDDVTK.H                   |
| 1073  | 1085 | 693,32         | 1384,63  | 1384,65  | -0,03 | 0    | R.VLDPTMEPGSPDK.V                       |
| 1110  | 1141 | 848,46         | 3389,80  | 3389,70  | 0,10  | 1    | K.VGEGETTEVTKEPIDEIVNY<br>APEIIP HGTR.E |
| 1159  | 1184 | 683,85         | 2731,39  | 2731,36  | 0,03  | 1    | K.DGLKDPETGEIIIEEPQDEVIH<br>GAK.D       |

SraP

| Start | End | Observed (m/z) | Mr (expt) | Mr (calc) | Delta | Miss | Peptide                |
|-------|-----|----------------|-----------|-----------|-------|------|------------------------|
| 560   | 575 | 912,92         | 1823,83   | 1823,84   | -0,01 | 0    | (K)MTNAGQSVTYFFTDVK(A) |
| 576   | 590 | 757,40         | 1512,79   | 1512,81   | -0,03 | 0    | (K)APTVTVGNQTIEVGK(T)  |
| 634   | 650 | 881,44         | 1760,87   | 1760,89   | -0,02 | 0    | (K)IGQSTVTVSTDQANNK(S) |

**S1 Fig. Mass spectrometric analysis.** For each analysis, detected peptides are given with their aa positions (Start, End), observed monoisotopic mass of the respective peptide in the spectrum [Observed (m/z)], experimental mass of the respective peptide calculated from the observed m/z value [Mr (expt)], theoretical mass of the respective peptide based on its sequence [Mr (calc)], difference between the theoretical Mr (calc) and experimental Mr (expt) masses [delta (Da)], number of missed trypsin cleavage sites (Miss) and peptide sequences (Peptide). The dots indicate trypsin cleavage sites.
