# Supplementary material for: The Plasmin-Sensitive Protein Pls in Methicillin-Resistant Staphylococcus aureus (MRSA) Is a Glycoprotein
Source: PubMed Central journal article supplement (PMC5230774; doi:10.1371/journal.ppat.1006110), 2017-01-12
Supplement: ppat.1006110.s004.pdf [file ppat.1006110.s004.pdf]

1 ATATTCTAGT CGTCGCAAAA AACAAAACAA ATAATACAAT ATGACCCAGG TCCTTGTGGC CTGGTTTTTT TTATGATTAC  
81 ACATGCAATA GATGTATTTT TCATATAAAA TAAACAATAA AGATACGGAA TAAAACCTAT ATGAGGCGAT AATATGAATT  
>>M N  
161 ACATTTTAGG AACAAATTTA GAAAGTAAA TTACAGGTGT AGAAAAAGCG CAAATAAATA GATTGAAGTT GTTCAAACAA  
Y I L G T I L E S K I T G V E K A Q I N R L K L F K Q  
241 CACGGCATAT CTTCAAAATG TGTATATGTT AAATGGAATC CTTATTCATA CACATATGCG AAGCAACATC AGATTGAAAA  
H G I S S K C V Y V K W N P Y S Y T Y A K Q H Q I E  
321 TGATGTATTT ACAATGTATG ACTATTTTCA AAAAGCAATC AATTATAAAA AGACAAAGCA AGTTAACTGG ATACAGTATT  
N D V F T M Y D Y F Q K A I N Y K K T K Q V N W I Q Y  
401 GGGAAAAGTC ATGTAGGTAC ACATTGAAAT TTGTGGAAAA TTCAAATGAT GTCAGAATAT ATGATGAAGA GCAATTTGTA  
W E K S C R Y T L K F V E N S N D V R I Y D E E Q F V  
481 ATGTATGCTC ATTTTTTAGA TAAACAGTAT CATCAATTA ACTATGTGAA TTATTTTGAT CATAAAGAA GAAAAGTAAA  
M Y A H F L D K Q Y H Q L N Y V N Y F D H K R R K V  
561 ACGCGAATTG TATGATGGAA GAGGCTTTTT AAGTTGTCTT CGAATTTTGT GCGAAGGACA ACGGATTGTA CTCGAAAATT  
K R E L Y D G R G F L S C S R I L G E G Q R I V L E N  
641 ACTATACACC TAATGGGGAA ATCGTCATCC AAAAATATTT CGACGATATA AAAGGAAAA ACACGCTCAC AAAGGTTATC  
Y Y T P N G E I V I Q K Y F D D I K G K N T L T K V I  
721 TTAAATGAAG ACCAGCAGCA ACAATTTTTT GATACAGAAG ATGAATTAGT TCAATATTTT CTCCATCAAT TATGTAAAAA  
L N E D Q Q Q Q F F D T E D E L V Q Y F L H Q L C K  
801 TAATGATCAA ATCATATTAG ATCGTCCTCA TGAATTAGGA AATGTTATAG CGGGATTAAA TCAAAGTATT CCAGTTGTGTG  
N N D Q I I L D R P H E L G N V I A G L N Q S I P V V  
881 TTGTGCTCCA TAGTACACAT TTATCCGGTA CCGGTAATGG TATAAAAAGT TTTTATAAAA CAGTATTTAA TAATTTAACA  
V V L H S T H L S G T G N G I K S F Y K T V F N N L T  
961 CGTTATAAAG CGATGTGTTG ATCAACAGAA CAGCAATGCC AAGATATTC ACAATATATT GAAAATAAAA TACCAGTTAT  
R Y K A I V V S T E Q Q C Q D I S Q Y I E N K I P V  
1041 CAATATTCCG GTTGGCTACG TGGCAAATTT AAAGTATCAA TTTGACATCA ATCAAAGGA GAAAATCAT ATCATATCAA  
I N I P V G Y V A N L K Y Q F D I N Q K E K N H I I S  
1121 TTGCTCGCCT CGTTGAAAAT AAACAAATTA AACATCAAAT TGAAGTGATC AAGCAATTAG TAACAAAACA TCCCAATATT  
I A R L V E N K Q I K H Q I E V I K Q L V T K H P N I  
1201 CAATGAATA TTTATGGACA TGGAAATGGT TTGTGAGAAT ATCGACAAC TGTAGAAGAT TATCATTTAT CGGAACATGT  
Q L N I Y G H G N G L S E Y R Q L V E D Y H L S E H  
1281 TAAATTCAT GGTTTAAGA CGCATATTAA TGAAGAGATT GCTAAAGCAG AACTGATGTT ATCGACAAGT AAAATGGAAG  
V K F H G F K T H I N E E I A K A E L M L S T S K M E  
1361 GTTTTGGCTT AGCAATTTTA GAGTCGCTTT CAGTAGGTAC ACCAGTGATC AGTTATGATA TAGATTATGG GCCATCAGAA  
G F G L A I L E S L S V G T P V I S Y D I D Y G P S E  
1441 CTGATTCAAG ATGGATTTAA TGGCTATTTA GTACCTAAAG GTGACATCAA TCAAATGGTT GAAAAGGTCG ATCAATTACT  
L I Q D G F N G Y L V P K G D I N Q M V E K V D Q L  
1521 AAATAATACT CAAAAATTC AACAGTTTTC GATTAATAGC ATAGAATCTG CACAACAGTA CAATGCAACT ACTATCAGTA  
L N N T Q K L Q Q F S I N S I E S A Q Q Y N A T T I S  
1601 CAAAGTGGCA AAATATTTTA AACTAAGTCA AAAGAAAAA GCATTTTCCT AGAATCATCT ATTTAACAAA CAACGTTTAT  
T K W Q N I L N  
1681 ACGAECTTAC ATGTTTAGTT AAATGACATA GGAAAACGCT TTTTTTATA AAAATAAAGG TGAAGTACAT TTATATAAGA  
I L  
1761 CGAACAAATT GGTCCCATTG TTTAATTAAC GACGCTTTAC TATATTGTTG CGCTTTTGCC AAACCTACCTT TTGACAGTCG  
R V F Q D W Q K I L S A K S Y Q Q A K A L S G K S L R  
1841 TTGTTGTA CTAGGATGAT CAATCACATA TTTTACTTTA TCAAATAGGG CATCTTCATC ATTTTATAGTA ATTTAAATAAC  
Q Q V E P H D I V Y K V K D F L A D E D N K T I L Y  
1921 CATTGAAATC AGGCGTAATC AATTCGTTAG GTCCATATTT AATATCATAA CTAATAACTG GAACACCATG TGCTAAAGAT  
G N F D P T I L E N P G Y K I D Y S I V P V G H A L S  
2001 TCAAGTAGCG CTAAGAGAA ACCTTCCATG TTAAGTTGTA TTAAGTTGTA GTAAGCATCG CTGTATTCCTT GGTTTAGATT  
E L L A L S F G E M N S T I L S L Y A D S Y E Q N L N  
2081 GCTTAAAAAG CCACGTAAGT AAACATGATT TTCCAATCCA TATTTTGTGA TCAATTCATT TAATTTTTTA CTTTCAGAAC  
S L F G R L Y V H N E L G Y K Q I L E N L K K S E S  
2161 CAAAACCATA CATATGAAGC TCTATTTTTG GGACATACGA TACTAAGCGT TTAATTAATT CAATTTGTTG ATGTAATTTG  
G F G Y M H L E I K P V Y S V L R K I L E I Q Q H L Q  
2241 TTTTCAGGTG AATAACGAGC AACGGAAATT AATTTAACAC TGCCTGATC TAATGTTTGG ACTGGTGTAT CAATGTTTC  
K E P S Y R A V S I L K V S R Q D L T Q V P T D I T E

2321 ACTATAGCCG ACAGGAATAT TAACAATTGG AATAGTATGG TTAATACGTT TTTCAACATC TAATTTTTGC TGCTCAGTAG  
S Y G V P I N V I P I T H N I R K E V D L K Q Q E T

2401 AAACGATAAT TGCACGATAT CGAGATAAAT TTTCAAACAT CGCTTTATAT ACATTTTTAA ATGGCGATGA ATCTAATGCA  
S V I I A R Y R S L N E F M A K Y V N K F P S S D L A

2481 TCAATATTTT TAATGTGTGT ACTGTGAAGC ACAGCTACTA CTGGGATTGA CTCAGGTGTT AAGTTGAAAA TAGGTGCTGT  
D I N K I H T S H L V A V V P I S E P T L N F I P A T

2561 ATACACATTA CGGTCACATG AAAATAAATC CCCATGTTGA TATAGTTGTT TAATGAAAAA TGGCCTAAT TCCGTTTCAT  
Y V N R D S F F L D G H Q Y L Q K I F F A G L E T E

2641 TATTAAGAA ATATGTTTGG TTAGCATAGT AAACAATAAT TTTTTGACT TCTGGTTTGC CATCCTTGTG AGAAAAATAC  
N N F F Y Q K N A Y Y V I I K Q V E P K G D K Y S F Y

2721 TTTTCTAATT TTGTGTCACC TTCTGGATTA TAGAAAAATT CACATAATGT TTGTTGTTTA TCAACAAGAA TCCTACTACA  
K E L K T D G E P N Y F F E C L T Q Q K D V L I R S C

2801 ACTTAAAAAG CCACGCACAT CATAAAAAATC ACGTTTTACT TTTCGTCTTT GACTATCAAA ATGATTCACA TAATCTAATA  
S L F G R V D Y F D R K V K R R Q S D F H N V Y D L

2881 TACGATATTT AGGATCTTGA AAATGGGCAT ACATTAAGAA ACGCTCTTGA TCATATATTC TAAAGTCATG ACTATTTTCA  
I R Y K P D Q F H A Y M L F R E Q D Y I R F D H S N E

2961 ACATGTTTTA AAGTATAATG ACATTCATCA GTCCAATACG ACAACCAGTC AAATGGTTCA TTGCGTCTCA AATATGTTGC  
V H K L T Y H C E D T W Y S L W D F P E N R E L Y T A

3041 TTCTTGAAG AAATCATAACA TATTAATATA GTCAGAACTA GTAATATAAT TTTGGGCATT TCTATATAAA TATCTATTCC  
E Q F F D Y M N I Y D S S T I Y N Q A N R Y L Y R N

3121 ATGACAGAAA TACACATTGC GCTGGTCTTC CCATTTCTTT AAATAAATTT AAACGATTAA TAATTGCTTT TTCTATCCCA  
W S L F V C Q A P R G M E K F L N L R N I I A K E I G

3201 GTTAAATTAA CACCTAAACT ATTACCTACA AAATAATTCa TTTACAACAC CACTTATATC TATTTTTTAT AATTATATCA  
T L N V G L S N G V F Y N M<<

3281 CATAATATTT AATTACTTCT TTTAACTGGA TGATGTGTTT ATTTATAAAA CAACAAATTT TGATATTTAT AATGATAGTA

3361 GTTATTC AACTACGAC CAATATATCA TGTAGAGCTT AGGATATTTGA TTTATGCCTC AGGCACATCA AATGAGAAGA

3441 TTTATAAAAAG AGATATACAA CTCTAGAAGG TATAATAAAA ACGCGCAACT AATGTTACGC GTTTGAATTA ATCATATGAT

3521 ATTATGGTTC TTCATCTTTT ATGGTGGGAA GGTAAAACTT CCTGCTTTTT TTAATACACA AAAAGCGCAA TTGCCTCTAT

3601 AATTTAAAGT GACCAAACCC AAATAAAGG AGACAAGTGC GCCTATGTTG AATGATACCT TAGAATTACT AAGAATAAAA  
>>M C N D T L E L L R I K

3681 GATGAAAATA TAAAATATAT AAACCAAGAA ATTGACGTCa TTATCAAAGG AAAAAAGCA ACAGTGGTTA ATGCTGTACT  
D E N I K Y I N Q E I D V I I K G K K A T V V N A V

3761 AACGTATAAG CCTTCGGCCT GTTATTGTTG TGGAGTTAAA AATGAAGGAC AAATTCATAA ACATGGTAAG CGTGTTTCTC  
L T Y K P S A C Y C C G V K N E G Q I H K H G K R V S

3841 GTATTACTTT ACTTAAAAC CAAGGGTATA ACACATACCT CAACTTAGCT AAACAACGTT TTAATGCTT AGAATGCAAT  
R I T L L K T Q G Y N T Y L N L A K Q R F K C L E C N

3921 GGCACTTTTA CTGCTAAAAC GTCAATTGTT GATGAGTCGT GTTTTATCTC AAGATGTGTT ACTCAAAAAG TTATAGAAGA  
G T F T A K T S I V D E S C F I S R C V T Q K V I E

4001 AGCTACTAAA GTTAAAACAG AGATTGATAC TGCAGAAGAT AACTGTATCT CTCCATCTAC TGTAAGTCGT ATTAGAACTA  
E A T K V K T E I D T A E D N C I S P S T V S R I R T

4081 AAGCGGCTAA TTCATTACGA ATTAAACCGT TTAATTGTTT GCCAGAACAC ATCGCTATGG ATGAATTTAA AAGCGTTAAA  
K A A N S L R I K P F N C L P E H I A M D E F K S V K

4161 AATGTAACCTG GATCAATGAG TTTCAATTTT ATAGATAATG AACTCATGA TGTTATAGAT ATTTTAGAAA ATAGAACTAC  
N V T G S M S F I F I D N D T H D V I D I L E N R T

4241 AAGATFCTTG CGTGCCTAT TCGAGCGATT CGATTTAAAA AATCGACAAC AAGTTAAGAC GGTACTATT GACATGTATG  
T R F L R A Y F E R F D L K N R Q Q V K T V T I D M Y

4321 AACCTATGT CCGATTATTT CGGACCTAT TTCTAATGC AGCTATATTT TTTGACAGAT TCCATATCGT TCAACATTTA  
E P Y V R L F R D L F P N A A I I F D R F H I V Q H L

4401 AATAGGAAC TTAATAAGTA TCGTGTACAA GTTATGAATG AATACCGTAA TAAAAAGGA CCTAATTATA CAATTTTTAA  
N R E L N K Y R V Q V M N E Y R N K K G P N Y T I F

4481 GAATAACTGG AAAGTCTTAT TGATGGATAC TAGTAAAACC ATATTTAGTA AATACAGATG GAATAAATCT TTTAAGGCTT  
K N N W K V L L M D T S K T I F S K Y R W N K S F K A

4561 ATAACCGTCT ATCTGACATT GTAGAATTCa TGCTTTCAAA AGACGATATA CTACGACGCT CCTACGAAC TGTCCAAGGA  
Y K R S S D I V E F M L S K D D I L R R S Y E L V Q G

4641 TTAAGAAAAG ATCTAAGGTT ATGTAATTGG CCTAAATTTA TTAATCGTTT AAATTCAGTT AGTAAAAAGT CTGTGAGTAA  
L R K D L R L C N W P K F I N R L N S V S K K S V S

4721 AGGTGTATGG AAAGTGGTTA AATATTATAG AAAACATCAA AGGATGTTAA GAAATACAAT TTATTACCCA GCATTTAATA  
 K G V W K V V K Y Y R K H Q R M L R N T I Y Y P A F N

4801 ATGGTGCTAT AGAAGGAATT AATAATAAGA TAAAAATTAAT CAAGCGAATT TCTTTTGGTT ACAGAAATTT CAACAACTTT  
 N G A I E G I N N K I K L I K R I S F G Y R N F N N F

4881 AAAGCACGTA TAATGATGAT TTCAGCTTA TACAAAGGAG AAAAAAAGAA GACAACCAAG CCCAATAATG GACTGGCCGC  
 K A R I M M I F S L Y K G E K K K T T K P N N G L A

4961 CTAATAATAA AAACCTAAA AGTTGTAATT TAAAATAGTT CTTTAAATTA TATACCCACC ACATTGGGTG GAGAACCGAT  
 A

5041 ATTATTGCG ATACTTTAAT TTAGCGAAAG CATCATGTTG ATGGATAGAC TCTTCATTAC GACATTCGAT ATCGAAACCG

**S3 Fig. Nucleotide and respective amino acid sequences of the *sdgA/sdgB* region (SdgA/SdgB) and the upstream of *sdgB* located IS1181 element in strain 1061.**
